# Supplementary material for: Cell free DNA from respiratory pathogens is detectable in the blood plasma of Cystic Fibrosis patients
Source: PubMed Central journal article supplement (PMC7181635; doi:10.1038/s41598-020-63970-0), 2020-04-23
Supplement: 41598_2020_63970_MOESM1_ESM.pdf [file 41598_2020_63970_MOESM1_ESM.pdf]

**Cell free DNA from respiratory pathogens is detectable in the blood plasma of Cystic Fibrosis patients**

Sara L. Rassouljian Barrett<sup>1</sup>, Elizabeth A. Holmes<sup>1</sup>, Dustin R. Long<sup>2</sup>, Ryan C. Shean<sup>1</sup>, Gilbert E. Bautista<sup>3</sup>, Sumedha Ravishankar<sup>3</sup>, Vikas Peddu<sup>1</sup>, Brad T. Cookson<sup>1,3</sup>, Pradeep K. Singh<sup>3</sup>, Alexander L. Greninger<sup>1</sup>, Stephen J. Salipante<sup>1\*</sup>

**Author Information:**

<sup>1</sup>Department of Laboratory Medicine, University of Washington, Seattle, WA, USA

<sup>2</sup>Division of Critical Care Medicine, Department of Anesthesiology and Pain Medicine, University of Washington, Seattle, WA, USA

<sup>3</sup>Department of Microbiology, University of Washington School of Medicine, Seattle, WA, USA

\*Address correspondence to Stephen J. Salipante, [stevesal@uw.edu](mailto:stevesal@uw.edu)

**Supplementary Table 1. Relevant organism classifications examined in this study**

*Achromobacter xylosoxidans*

*Aspergillus* species

*Burkholderia cepacia* complex

*Burkholderia gladioli*

*Candida* species

*Chryseobacterium* species

*Enterobacter cloacae*

*Haemophilus influenzae*

*Mycobacterium* species

*Pseudallescheria boydii*

*Pseudomonas aeruginosa*

*Scedosporium apiospermum*

*Scedosporium boydii*

*Serratia marcescens*

*Staphylococcus aureus*

*Stenotrophomonas maltophilia*

*Trichosporon* species

**Supplementary Table 2. Characteristics of control population**

| <b>Sample Name</b> | <b>Age</b> | <b>Sex</b> |
|--------------------|------------|------------|
| Control1           | 53         | M          |
| Control2           | 35         | M          |
| Control3           | 50         | M          |
| Control4           | 21         | M          |
| Control5           | 35         | F          |
| Control6           | 21         | M          |
| Control7           | 35         | M          |
| Control8           | 36         | F          |
| Control9           | 38         | M          |
| Control10          | 46         | M          |
| Control11          | 38         | M          |
| Control12          | 54         | M          |



**Supplementary Table 4. Organisms identified by culture that were not recovered by cfDNA analysis**

| <b>Patient</b> | <b>Classification(s)</b>                                              |
|----------------|-----------------------------------------------------------------------|
| CF2            | 10 colonies <i>Aspergillus fumigatus</i> , 3+ <i>Candida albicans</i> |
| CF5            | 4+ <i>Haemophilus influenzae</i>                                      |
| CF7            | >30 colonies Presumptive <i>Trichosporon</i> species                  |
| CF9            | 3 colonies <i>Aspergillus fumigatus</i>                               |
| CF10           | 18 colonies <i>Aspergillus fumigatus</i>                              |
| CF14           | 1 colony <i>Aspergillus fumigatus</i>                                 |
| CF15           | >30 colonies <i>Aspergillus fumigatus</i>                             |
| CF16           | 2+ <i>Chryseobacterium</i> species                                    |
| CF17           | 5 colonies <i>Pseudallescheria boydii</i> complex                     |
| CF21           | 2+ <i>Haemophilus influenzae</i>                                      |
